# Supplementary material for: Labour-Market Characteristics and Self-Rated Health: Evidence from the China Health and Retirement Longitudinal Study
Source: MDPI journal article supplement (doi:10.3390/ijerph20064748), 2023-03-08
Supplement: s1 [file s1]

Supplementary

**Table S1.** Distribution of self-rated health measured by 5-point scale among the working population.

| Self-rated health | N (%)         |
|-------------------|---------------|
| Very good         | 396 (10.25)   |
| Good              | 919 (23.78)   |
| Fair              | 1,998 (51.71) |
| Poor              | 490 (12.68)   |
| Very poor         | 61 (1.58)     |
| Total             | 3,864         |

**Table S2.** Association between each labour market characteristic and poor self-rated health in working population according to region.

|                                    | East                  | Central               | West                  | Northeast             | Overall effect of       |
|------------------------------------|-----------------------|-----------------------|-----------------------|-----------------------|-------------------------|
|                                    | N=1613 (42%)          | N=1056 (27%)          | N=903 (23%)           | N=292 (8%)            | interactions            |
|                                    | OR (95% CI)           | OR (95% CI)           | OR (95% CI)           | OR (95% CI)           | Age- and sex-           |
|                                    | Age- and sex-adjusted | Age- and sex-adjusted | Age- and sex-adjusted | Age- and sex-adjusted | adjusted                |
| <b>Employment status</b>           |                       |                       |                       |                       |                         |
| Employed                           | Ref                   | Ref                   | Ref                   | Ref                   | Chi <sup>2</sup> =4.89  |
| Self-employed                      | 1.24 (0.86,1.79)      | 1.16 (0.79,1.70)      | 1.09 (0.72,1.65)      | 1.55 (0.75,3.22)      | P=0.77                  |
| Unpaid family business             | 2.84 (1.72,4.69)**    | 2.05 (1.11,3.81)*     | 2.13 (1.22,3.71)*     | 0.95 (0.24,3.73)      |                         |
| Not enough information to classify | 2.70 (1.17,6.23)*     | 1.89 (0.75,4.75)      | 3.91 (1.99,7.68)**    | -                     |                         |
| <b>Weekly working hours</b>        |                       |                       |                       |                       |                         |
| 1-39 h/week                        | 2.63 (1.52,4.53)*     | 1.08 (0.63,1.85)      | 1.48 (0.85,2.59)      | 9.78 (2.02,47.28)*    | Chi <sup>2</sup> =22.16 |
| 40-49 h/week                       | Ref                   | Ref                   | Ref                   | Ref                   | P=0.04                  |
| 50-59 h/week                       | 0.99 (0.54,1.83)      | 0.96 (0.54,1.70)      | 0.93 (0.49,1.76)      | 4.42 (0.84,23.25)     |                         |
| ≥60 h/week                         | 1.63 (0.96,2.76)      | 0.88 (0.53,1.47)      | 1.52 (0.90,2.58)      | 5.76 (1.26,26.27)*    |                         |
| Missing <sup>a</sup>               | 3.84 (2.18,6.77)**    | 0.88 (0.47,1.67)      | 2.33 (1.30,4.15)*     | 8.97 (1.60,50.31)*    |                         |
| <b>Public or private sectors</b>   |                       |                       |                       |                       |                         |

|                                         |                    |                   |                    |                     |                         |
|-----------------------------------------|--------------------|-------------------|--------------------|---------------------|-------------------------|
| Public                                  | Ref                | Ref               | Ref                | Ref                 | Chi <sup>2</sup> =3.12  |
| Private                                 | 2.13 (1.25,3.64)*  | 1.53 (0.97,2.42)  | 1.35 (0.88,2.07)   | 1.12 (0.56,2.24)    | P=0.37                  |
| Missing <sup>b</sup>                    | -                  | -                 | 11.14(0.95,129.93) | -                   |                         |
| <b>Earned income</b>                    |                    |                   |                    |                     |                         |
| 1 (Richest)                             | Ref                | Ref               | Ref                | Ref                 | Chi <sup>2</sup> =16.89 |
| 2                                       | 1.32 (0.70,2.46)   | 1.69 (0.80,3.57)  | 1.56 (0.68,3.56)   | 4.89 (0.52,45.88)   | P=0.33                  |
| 3                                       | 1.08 (0.57,2.06)   | 1.01 (0.45,2.25)  | 1.74 (0.75,4.02)   | 2.88 (0.25,33.32)   |                         |
| 4                                       | 1.71 (0.91,3.22)   | 1.80 (0.89,3.63)  | 1.75 (0.79,3.88)   | 14.57(1.79,118.62)* |                         |
| 5 (Poorest)                             | 3.34 (1.86,6.01)** | 2.35 (1.15,4.76)* | 2.66 (1.24,5.71)*  | 13.63(1.65,112.81)* |                         |
| Missing <sup>b</sup>                    | 3.48 (1.97,6.16)** | 1.78 (0.87,3.64)  | 4.23 (2.03,8.78)** | 9.57 (1.14,80.56)*  |                         |
| <b>Occupation</b>                       |                    |                   |                    |                     |                         |
| Managers and professionals              | Ref                | Ref               | Ref                | Ref                 | Chi <sup>2</sup> =11.23 |
| Technicians and associate professionals | 0.20 (0.03,1.46)   | 1.19 (0.43,3.31)  | 0.67 (0.19,2.35)   | -                   | P=0.42                  |
| Clerks and workers                      | 0.99 (0.66,1.50)   | 1.29 (0.84,1.98)  | 1.04 (0.67,1.63)   | 0.67 (0.30,1.50)    |                         |
| Elementary occupations                  | 0.94 (0.52,1.70)   | 1.01 (0.54,1.92)  | 1.19 (0.64,2.19)   | 1.87 (0.59,5.94)    |                         |
| Missing <sup>a</sup>                    | 2.50 (1.47,4.25)*  | 1.82 (1.00,3.33)  | 1.82 (1.07,3.10)*  | 0.85 (0.25,2.95)    |                         |
| <b>Years working on current job</b>     |                    |                   |                    |                     |                         |
| ≤10 years                               | Ref                | Ref               | Ref                | Ref                 | Chi <sup>2</sup> =6.87  |

|                      |                   |                   |                  |                   |        |
|----------------------|-------------------|-------------------|------------------|-------------------|--------|
| >10 years            | 0.87 (0.61,1.24)  | 1.19 (0.82,1.74)  | 0.85 (0.58,1.25) | 0.39 (0.18,0.86)* | P=0.33 |
| Missing <sup>b</sup> | 2.02 (1.30,3.12)* | 1.98 (1.17,3.35)* | 1.54 (0.95,2.50) | 1.48 (0.46,4.74)  |        |

**Employer-provided/**

**self-employed covered insurances**

|                        |                  |                  |                   |                   |                        |
|------------------------|------------------|------------------|-------------------|-------------------|------------------------|
| At least one insurance | Ref              | Ref              | Ref               | Ref               | Chi <sup>2</sup> =9.73 |
| None                   | 1.12 (0.74,1.69) | 1.10 (0.69,1.77) | 1.68 (1.06,2.66)* | 3.29 (1.28,8.42)* | P=0.14                 |
| Missing <sup>b</sup>   | 1.55 (0.88,2.72) | 1.22 (0.64,2.31) | 1.88 (1.04,3.40)* | 1.07 (0.29,3.98)  |                        |

---

Abbreviations: *OR* odds ratio, *CI* confidence interval.

<sup>a</sup>Implausible value or not answered.

<sup>b</sup>Implausible values, not answered or not asked.

\*p<0.05, \*\*p<0.001

Four major economic regions in China

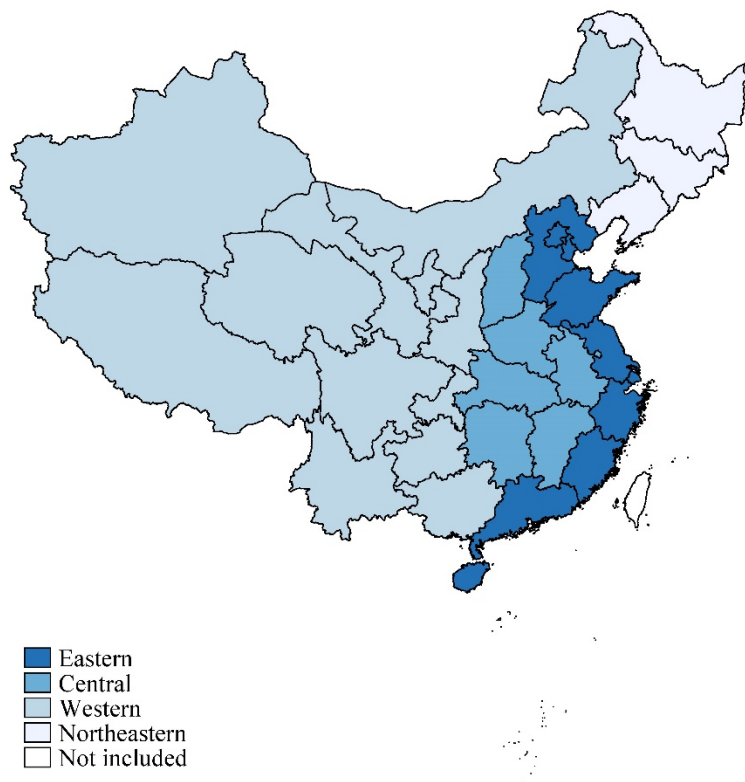

**Figure S1.** Four major economic regions in China.
